# Supplementary material for: A novel 3D Cu(i) coordination polymer based on Cu6Br2 and Cu2(CN)2 SBUs: in situ ligand formation and use as a naked-eye colorimetric sensor for NB and 2-NT
Source: Royal Society of Chemistry journal article supplement (doi:10.1039/c5dt03656a), 2015-11-11
Supplement: c5dt03656a2.pdf [file c5dt03656a2.pdf]

## **A novel 3D Cu(I) coordination polymer based on $\text{Cu}_6\text{Br}_2$ and $\text{Cu}_2(\text{CN})_2$ SBUs: in situ ligand formations and naked-eye colorimetric sensor of NB and 2-NT**

J. F. Song<sup>\*a</sup>, Y. Li<sup>a</sup>, R. S. Zhou<sup>a</sup>, T.P. Hu<sup>a</sup>, Y. L. Wen<sup>a</sup>, J. Shao<sup>a</sup>, X. B. Cui<sup>\*b</sup>

### **Figure caption**

**Table S1** Bond lengths (Å) and Angles (deg) for compound **1**

**Fig. S1** Experimental and simulated X-ray diffraction patterns of compounds **1**

**Fig.S2** The DG-DTG curve of compound **1**

**Fig. S3** Fluorescence titration of compound **1** dispersed in ethanol by gradual addition of 0.1 M solution of DNCB in ethanol

**Fig. S4** Fluorescence titration of compound **1** dispersed in ethanol by gradual addition of 0.1 M solution of TNP in ethanol

**Fig. S5** The film of compound **1** on the glass substrate (a) under daylight, (b) under UV illumination, (c) after the addition of 50  $\mu\text{L}$   $0.1\text{molL}^{-1}$  2-NT under UV illumination

---

<sup>a</sup>Department of Chemistry, North University of China, Taiyuan, Shanxi, 030051, P.R. China. E-mail:jfsong0129@gmail.com

<sup>b</sup>College of Chemistry and State Key Laboratory of Inorganic Synthesis and Preparative Chemistry, Jilin University, Changchun, Jilin, 130023.E-mail:cuixb@mail.jlu.edu.cn

Table S1 Bond lengths (Å) and Angles (deg) for compound **1**

| <b>1</b>            |            |                      |            |
|---------------------|------------|----------------------|------------|
| Br(1)-Cu(2)         | 2.6777(14) | N(4)#3-Cu(1)-N(4)#4  | 107.8(2)   |
| Br(1)-Cu(3)         | 2.7056(15) | C(1)-Cu(1)-C(1)#2    | 111.1(2)   |
| Br(1)-Cu(4)         | 2.7515(11) | N(4)#3-Cu(1)-C(1)#2  | 94.76(16)  |
| Br(1)-Cu(4)#1       | 2.7515(11) | N(4)#4-Cu(1)-C(1)#2  | 94.76(16)  |
| C(1)-Cu(1)          | 1.940(8)   | N(1)-Cu(2)-N(5)#5    | 118.39(14) |
| C(1)-Cu(1)#2        | 2.430(8)   | N(1)-Cu(2)-N(5)#6    | 118.39(14) |
| Cu(1)-N(4)#3        | 2.012(4)   | N(5)#5-Cu(2)-N(5)#6  | 108.7(2)   |
| Cu(1)-N(4)#4        | 2.012(4)   | N(1)-Cu(2)-Br(1)     | 109.3(2)   |
| Cu(1)-C(1)#2        | 2.430(8)   | N(5)#5-Cu(2)-Br(1)   | 99.24(12)  |
| Cu(1)-Cu(1)#2       | 2.5048(19) | N(5)#6-Cu(2)-Br(1)   | 99.24(12)  |
| Cu(2)-N(1)          | 1.936(6)   | N(2)#1-Cu(3)-N(2)#7  | 159.0(3)   |
| Cu(2)-N(5)#5        | 2.035(4)   | N(2)#1-Cu(3)-Br(1)   | 100.51(13) |
| Cu(2)-N(5)#6        | 2.035(4)   | N(2)#7-Cu(3)-Br(1)   | 100.51(13) |
| Cu(3)-N(2)#1        | 1.894(4)   | N(3)#7-Cu(4)-N(3)    | 143.2(2)   |
| Cu(3)-N(2)#7        | 1.894(4)   | N(3)#7-Cu(4)-Br(1)#1 | 112.19(13) |
| Cu(4)-N(3)#7        | 1.955(4)   | N(3)-Cu(4)-Br(1)#1   | 96.06(13)  |
| Cu(4)-N(3)          | 1.955(4)   | N(3)#7-Cu(4)-Br(1)   | 96.06(13)  |
| Cu(4)-Br(1)#1       | 2.7515(11) | N(3)-Cu(4)-Br(1)     | 112.19(13) |
| N(2)-Cu(3)#1        | 1.894(4)   | Br(1)#1-Cu(4)-Br(1)  | 80.15(4)   |
| N(4)-Cu(1)#8        | 2.012(4)   | N(1)-C(1)-Cu(1)      | 179.8(7)   |
| N(5)-Cu(2)#9        | 2.035(4)   | N(1)-C(1)-Cu(1)#2    | 111.3(6)   |
| Cu(2)-Br(1)-Cu(3)   | 86.04(4)   | C(1)-Cu(1)-N(4)#3    | 120.96(14) |
| Cu(2)-Br(1)-Cu(4)#1 | 125.44(2)  | C(1)-Cu(1)-N(4)#4    | 120.96(14) |
| Cu(4)#1-Br(1)-Cu(4) | 99.85(4)   |                      |            |

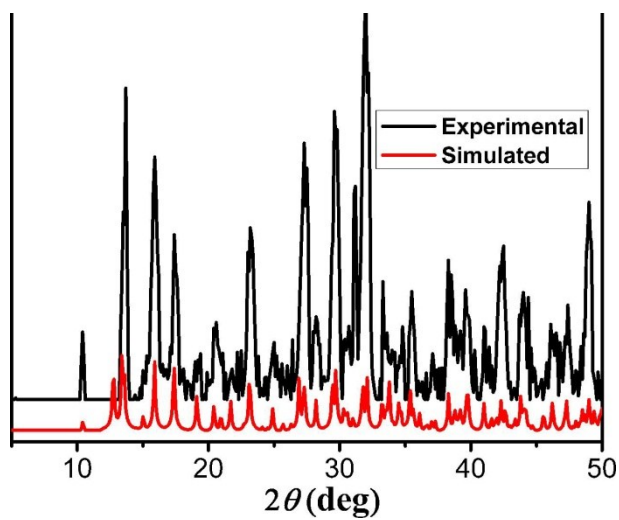

Fig. S1 Experimental and simulated X-ray diffraction patterns of compounds 1

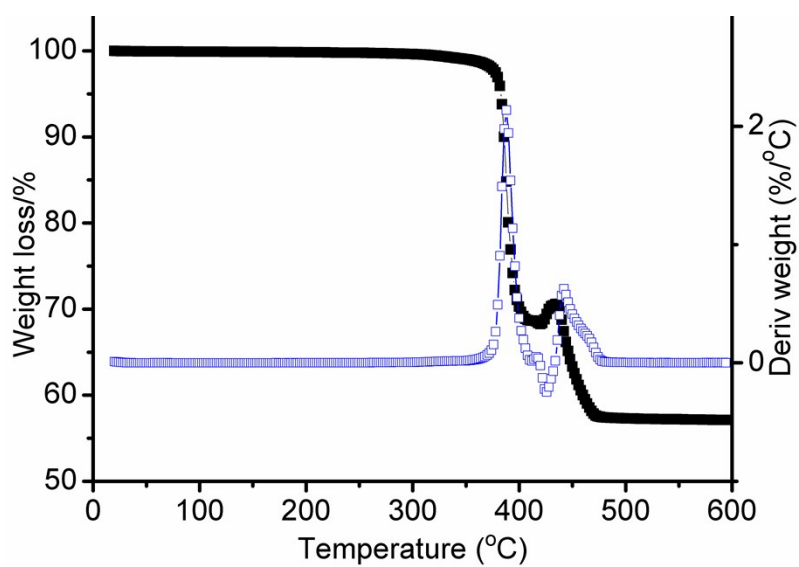

Fig.S2 The DG-DTG curve of compound 1

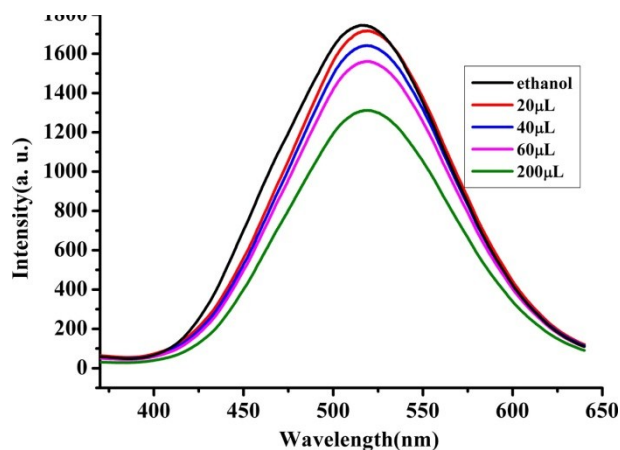

Fig. S3 Fluorescence titration of compound **1** dispersed in ethanol by gradual addition of 0.1 M solution of DNCB in ethanol

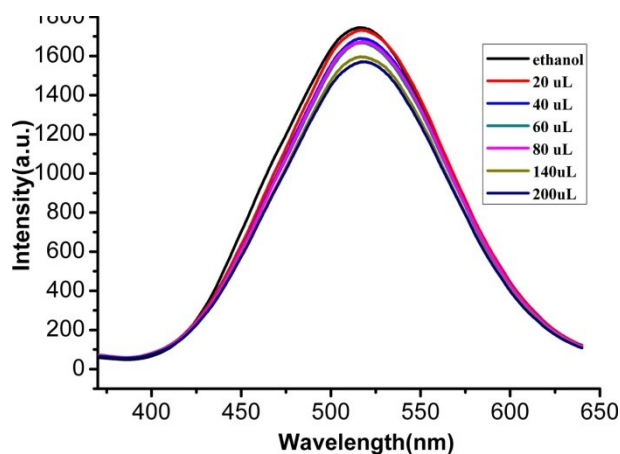

Fig. S4 Fluorescence titration of compound **1** dispersed in ethanol by gradual addition of 0.1 M solution of TNP in ethanol

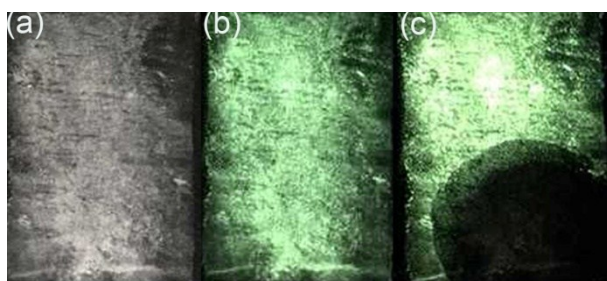

Fig. S5 The film of compound **1** on the glass substrate (a) under daylight, (b) under UV illumination, (c) after the addition of 50 uL 0.1 mol L<sup>-1</sup> 2-NT under UV illumination
